# Supplementary material for: Photophysics and photochemistry of rose bengal bound to human serum albumin
Source: Royal Society of Chemistry journal article supplement (doi:10.1039/b901056d), 2009-03-20
Supplement: b901056d.pdf [file b901056d.pdf]

## Supplementary material.

### Encinas and Lissi's procedure

The methodology is based on carrying out quenching experiments at several HSA concentrations [52]. The Stern-Volmer plots obtained from primary data (fluorescence quenching of HSA Trp residue by different RB concentrations) are shown in the supplementary Fig.1a. RB concentrations that render  $F_0/F$  values equal to 1.25 ( $RB_{1.25}$ ) were plotted as a function of the protein concentration (see supplementary Fig. 1b) and the association constant was calculated employing **Eq. 1.1**;

$$[RB]_{1.25} = n/K + n [HSA] \quad (\text{Eq. 1.1})$$

where **n** is the occupation number and **K** is the association constant. From the ratio between the intercept and the slope can be calculated the association constant (ca.  $1.1 \mu\text{M}^{-1}$ ). This value is very close to that obtained by the other methodologies.

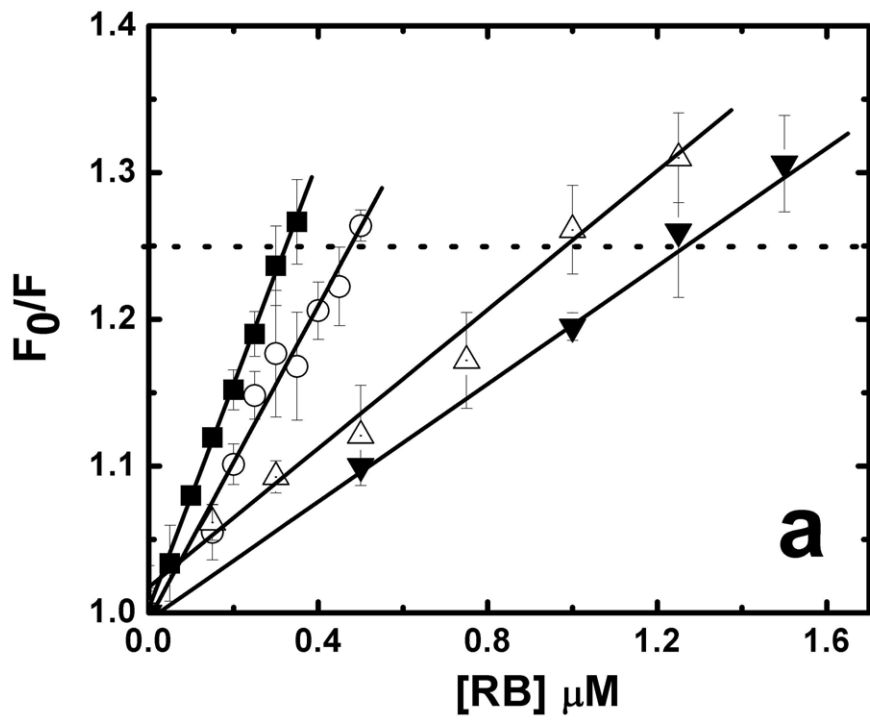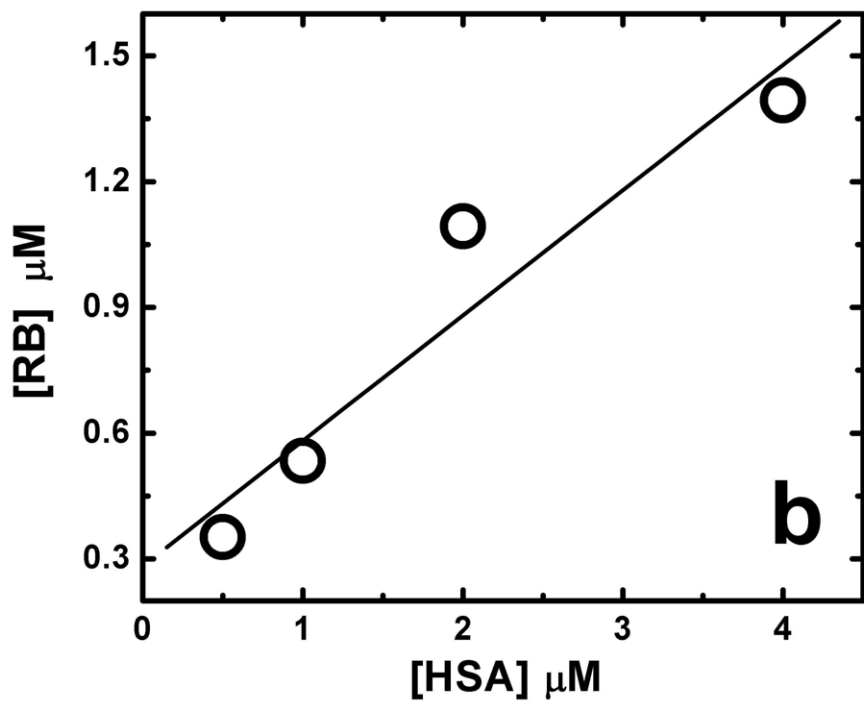

**Supplementary Figure 1.** (a) Stern-Volmer plots for the quenching of HSA fluorescence by RB at different protein concentrations: ( $\blacksquare$ ) 0.5, ( $\circ$ ) 1.0, ( $\triangle$ ) 2.0 and ( $\blacktriangledown$ ) 4.0  $\mu\text{M}$ . (b). RB concentrations at which  $F_0/F = 1.25$ , plotted as a function of HSA concentration.
